# Supplementary material for: Rational engineering of Acinetobacter tandoii glutamate dehydrogenase for asymmetric synthesis of l-homoalanine through biocatalytic cascades
Source: Royal Society of Chemistry journal article supplement (doi:10.1039/d1cy00376c), 2021-01-01
Supplement: d1cy00376c1.pdf [file d1cy00376c1.pdf]

## Electronic Supplementary Information

### **Rational engineering of *Acinetobacter tandoii* glutamate dehydrogenase for asymmetric synthesis of L-homoalanine through biocatalytic cascades**

Liuzhu Wang,<sup>#</sup> Shiqing Diao,<sup>#</sup> Yangyang Sun, Shuiqin Jiang, Yan Liu, Hualei Wang\* and Dongzhi Wei\*

State Key Laboratory of Bioreactor Engineering, NewWorld Institute of Biotechnology, East China  
University of Science and Technology, Shanghai, 200237

<sup>#</sup> Liuzhu Wang and Shiqing Diao contributed equally to this work.

\*Corresponding author:

Hua-Lei Wang: hlwang@ecust.edu.cn

\*\*Corresponding author:

Dong-Zhi Wei: dzhwei@ecust.edu.cn

Table S1. Enzyme activities of dual cofactor dependent GluDHs towards 2-ketobutyric acid in laboratory.

| Enzyme                                     | Activity (U/mg) |
|--------------------------------------------|-----------------|
| <i>Acinetobacter tandoii</i> GluDH         | 57.3 ± 9.1      |
| <i>Cupriavidus necator</i> GluDH           | 42.5 ± 3.7      |
| <i>Geobacillus thermocatenulatus</i> GluDH | 31.4 ± 1.2      |

Table S2. Kinetic parameters of AtGluDH towards NADH and NADPH.

|                    | $k_{cat}$ (s <sup>-1</sup> ) | $K_m$ (mM) | $k_{cat} / K_m$ (mM <sup>-1</sup> s <sup>-1</sup> ) |
|--------------------|------------------------------|------------|-----------------------------------------------------|
| NADH <sup>a</sup>  | 3673.1±121.9                 | 0.52±0.08  | 7063.65                                             |
| NADPH <sup>b</sup> | 4013.8±208.5                 | 3.87±0.14  | 1037.16                                             |

<sup>a</sup> Data for NADH and NADPH was measured with 200 mM NH<sub>4</sub>Cl/NH<sub>4</sub>OH buffer (pH 9.5), 50 mM 2-ketobutyric acid, 0.01-5 mM NADH or 0.01-30 mM NADPH and at 30°C.

Table S3. Primers used for site-directed mutagenesis of AtGluDH.

| Primer  | Sequence (5'-3')                      |
|---------|---------------------------------------|
| K76G-F  | GGT <b>GG</b> CGGCGGTATTCGTTACCAT     |
| K76G-R  | TGGTCCACGCGACAAATTATGTTG              |
| K76A-F  | GGT <b>GCG</b> GGCGGTATTCGTTACCAT     |
| K76A-R  | TGGTCCACGCGACAAATTATGTTG              |
| K76V-F  | GGT <b>GTG</b> GGCGGTATTCGTTACCAT     |
| K76V-R  | TGGTCCACGCGACAAATTATGTTG              |
| K76L-F  | GGT <b>CTG</b> GGCGGTATTCGTTACCAT     |
| K76L-R  | TGGTCCACGCGACAAATTATGTTG              |
| K76I-F  | GGT <b>ATC</b> GGCGGTATTCGTTACCAT     |
| K76I-R  | TGGTCCACGCGACAAATTATGTTG              |
| S355A-F | GTGG <b>GCT</b> ACTTCGAGTGGGTTCAA     |
| S355A-R | GGTTACACCGCCAGCATTACAGAG              |
| S355V-F | GTGG <b>TGT</b> ACTTCGAGTGGGTTCAA     |
| S355V-R | GGTTACACCGCCAGCATTACAGAG              |
| T180A-F | GTGG <b>GCG</b> GGTAAACCTGTACATTTAGGT |
| T180A-R | TACACCTGTGACAGTATGACCCTT              |
| T180V-F | GTGG <b>TGG</b> GTAAACCTGTACATTTAGGT  |
| T180V-R | TACACCTGTGACAGTATGACCCTT              |
| T180S-F | GTGT <b>TCT</b> GGTAAACCTGTACATTTAGGT |
| T180S-R | TACACCTGTGACAGTATGACCCTT              |
| T180C-F | GTGT <b>GCG</b> GTAAACCTGTACATTTAGGT  |
| T180C-R | TACACCTGTGACAGTATGACCCTT              |

Table S4. Binding free energy analysis using the Molecular Mechanics Poisson Boltzmann (Generalized Born) surface area method.

| Energy (kcal/mol) <sup>a</sup> | AtGluDH-WT          | AtGluDH-K76L/T180C |
|--------------------------------|---------------------|--------------------|
| VDW                            | -11.32±2.83         | -14.18±2.97        |
| EEL                            | -32.49±8.33         | -10.71±8.46        |
| GB                             | 13.51±7.21          | -5.77±7.14         |
| GBSURF                         | -2.99±0.07          | -3.09±0.005        |
| GBGAS                          | -43.81±8.09         | -24.90±7.90        |
| GBSOLV                         | 10.52±7.21          | -8.87±7.13         |
| <b>GBTOT</b>                   | <b>-33.30±3.06</b>  | <b>-33.76±3.76</b> |
| PB                             | -20.64±9.44         | -44.51±5.15        |
| PBNPOLAR                       | -13.62±0.24         | -13.74±0.15        |
| PBDISPER                       | 20.52±0.62          | 20.71±0.62         |
| PBGAS                          | -43.81±8.09         | -24.90±7.90        |
| PBSOLV                         | -13.75±9.73         | -37.54±5.21        |
| <b>PBTOT</b>                   | <b>-57.56±10.16</b> | <b>-62.44±6.81</b> |

<sup>a</sup> VDW: van der Waals energy. EEL: energy of electrostatic. GBTOT/PBTOT: final binding free energy.

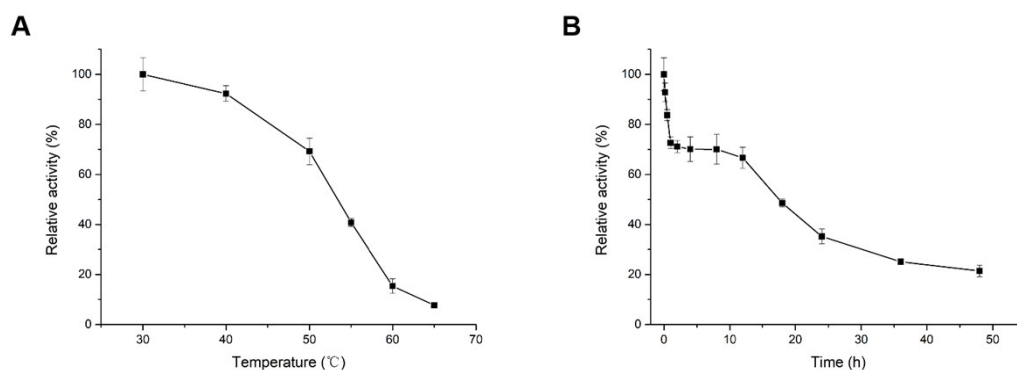

Figure S1. (A) Enzyme inactivation assay at different temperatures for 12 h. (B) Time courses of thermal inactivation at 50°C. Purified AtGluDH-WT was incubated at a certain temperature for a set time, and then added into the reaction mixture. A 200  $\mu$ L-scale reaction mixture containing a certain amount of purified AtGluDH-WT, 2-ketobutyric acid (50 mM), 0.1 mM NADH, 200 mM  $\text{NH}_4\text{Cl}/\text{NH}_4\text{OH}$  buffer (pH 9.5). Then, the activity was measured by monitoring the absorbance at 340 nm ( $\epsilon=6220 \text{ M}^{-1} \text{ cm}^{-1}$ ) at 30°C.

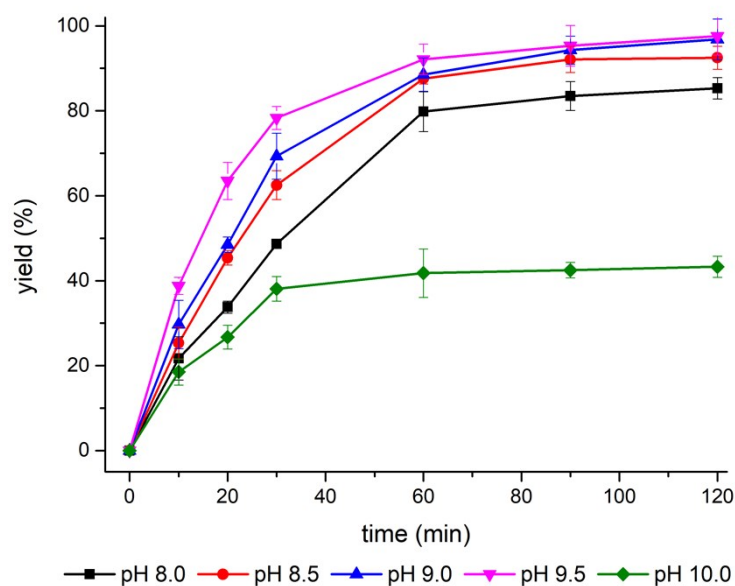

Figure S2. Reaction curve at different pH. A 20 mL-scale reaction mixture contained *EcTD* (3 g/L), *AtGluDH-WT* (10 g/L) and *BmGDH* (3 g/L) which were prepared as lyophilized cells, 0.5 M L-threonine, 0.1 mM NADH, 0.6 M glucose, 200mM  $(\text{NH}_4)_3\text{PO}_4$  buffer (pH 8.0-8.5) or 200 mM  $\text{NH}_4\text{Cl}/\text{NH}_4\text{OH}$  buffer (pH 9.0-10.0), and at 30°C.

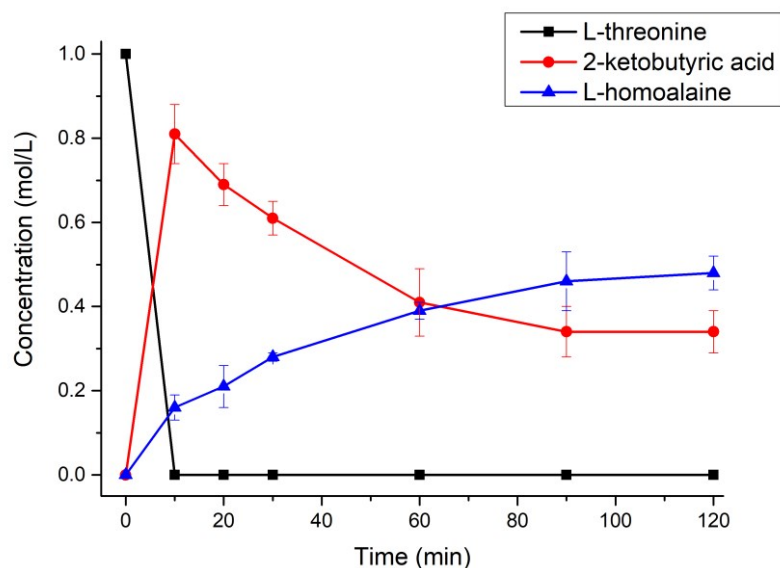

Figure S3. Cascade reaction curves with 1 M L-threonine as substrate. A 20 mL-scale reaction mixture contained *EcTD* (3 g/L), *AtGluDH-WT* (10 g/L) and *BmGDH* (3 g/L) which were prepared as lyophilized cells, 1 M L-threonine, 0.1 mM NADH, 1.2 M glucose, 200 mM  $\text{NH}_4\text{Cl}/\text{NH}_4\text{OH}$  buffer (pH 9.5), and at 30°C. Error bars represent the standard deviation of three independent experiments.

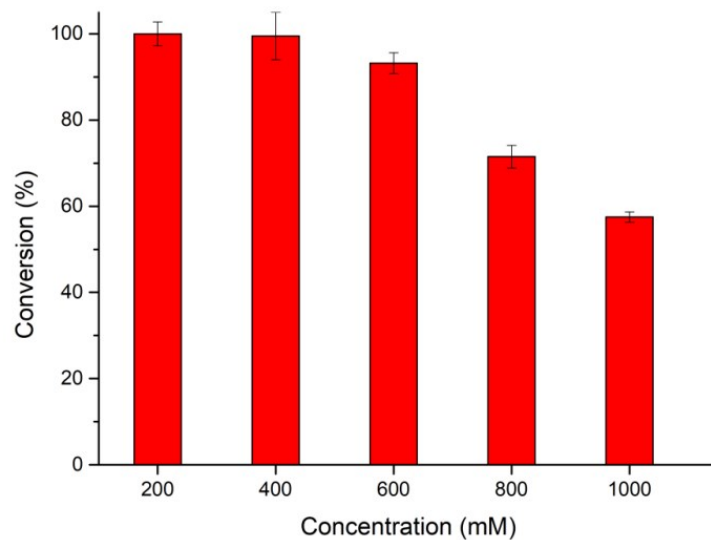

Figure S4. The conversion of the reductive amination of 2-ketobutyric acid by wild type *AtGluDH*. A 1 mL-scale reaction mixture contained *AtGluDH*-WT (10 g/L) and *BmGDH* (3 g/L) which were prepared as lyophilized cells, 2-ketobutyric acid (200-1000 mM), 0.1 mM NADH, glucose (1.2 x substrate concentration), 200 mM  $\text{NH}_4\text{Cl}/\text{NH}_4\text{OH}$  buffer (pH 9.5), and at 30°C within 24 h. Error bars represent the standard deviation of three independent experiments.

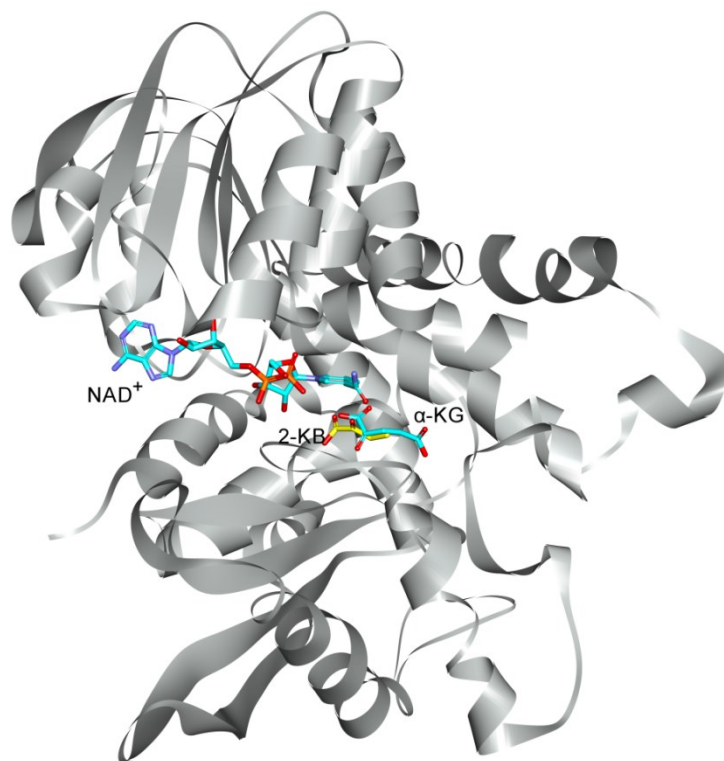

Figure S5. Homology model of *AtGluDH* with  $\text{NAD}^+$ ,  $\alpha$ -ketoglutarate and 2-ketobutyric acid.  $\text{NAD}^+$ ,  $\alpha$ -ketoglutarate and 2-ketobutyric acid are shown as sticks.

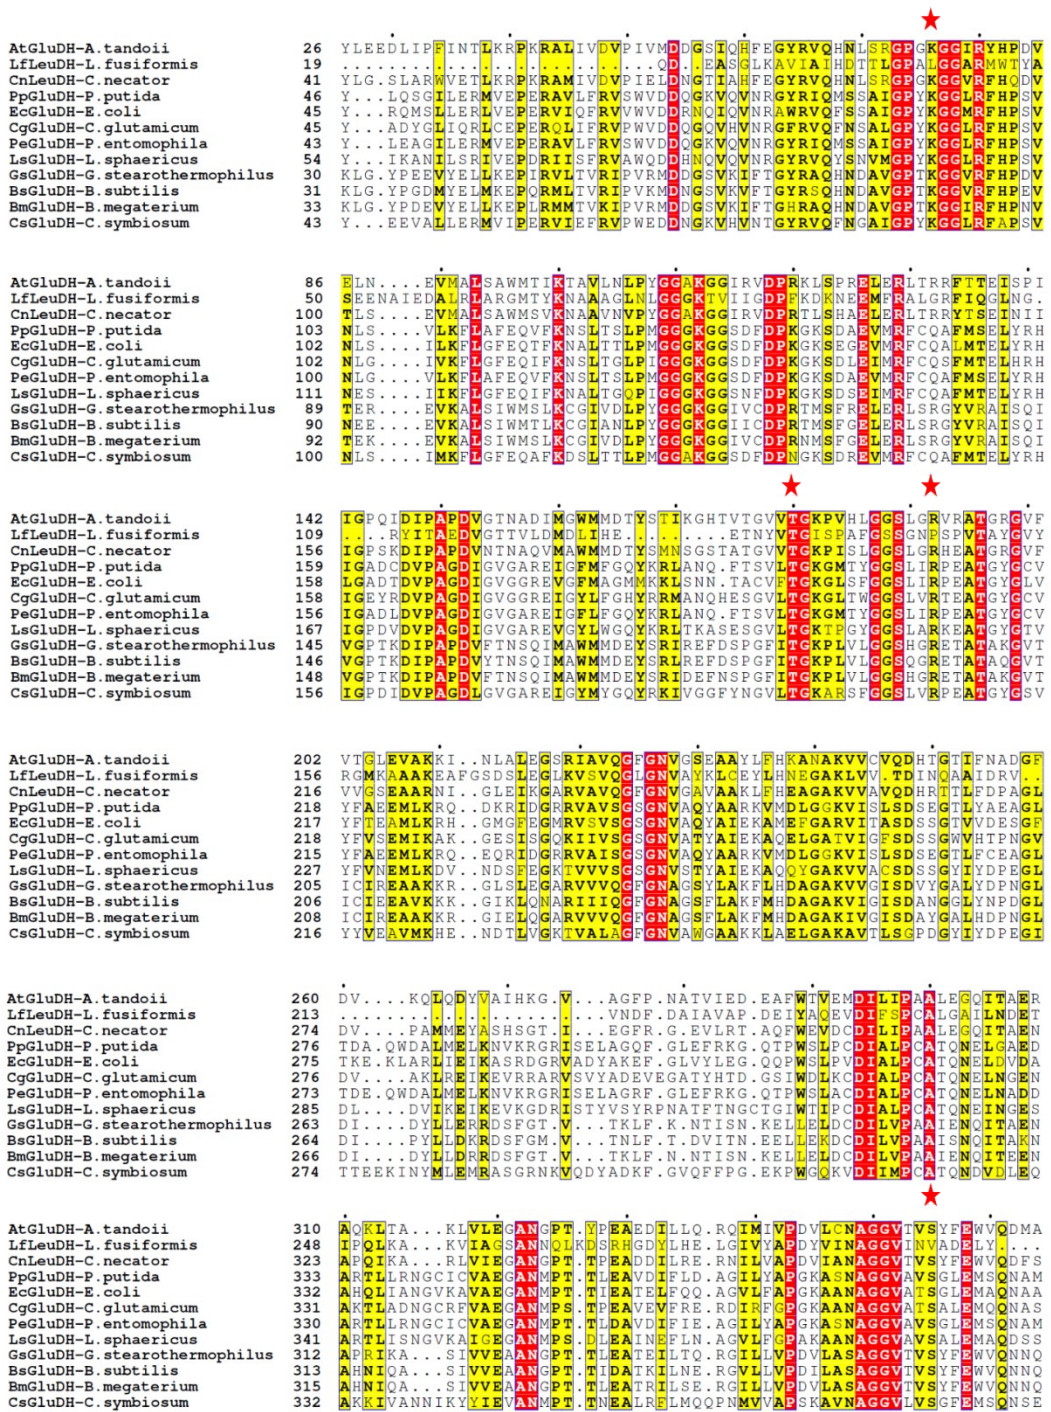

Figure S6. Multiple-sequence alignment of AADHs from some different sources with the help of T-coffee and Esprpt 3.

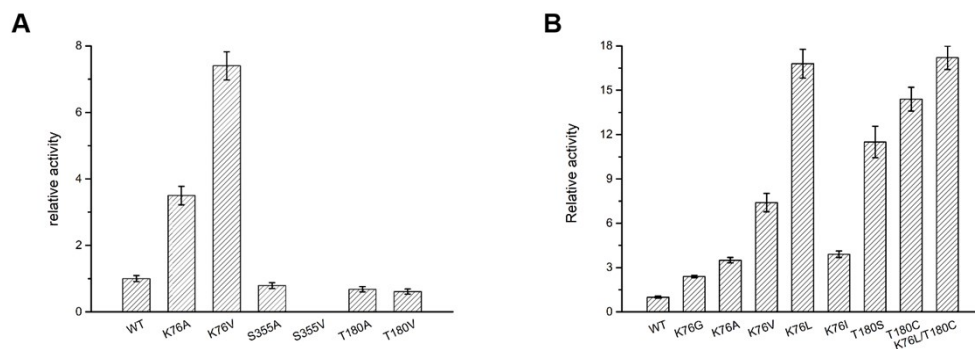

Figure S7. (A and B) Relative activity of the mutants of *AtGluDH* compared to the wild-type protein. Reaction conditions: 200  $\mu$ L final volume, 200 mM  $\text{NH}_4\text{Cl}/\text{NH}_4\text{OH}$  buffer (pH 9.5), 0.1 mM NADH, 50 mM 2-ketobutyric acid and at 30°C. Error bars represent the standard deviation of three independent experiments.

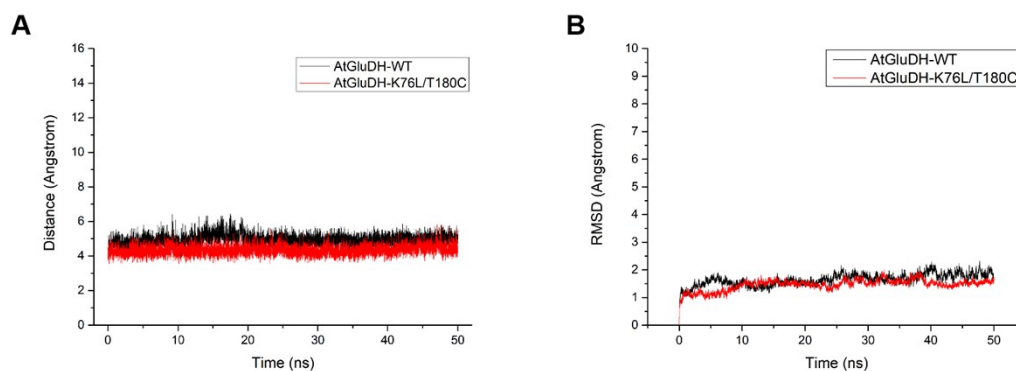

Figure S8. (A) Distance analysis between the reactive carbonyl carbon (C2) of the substrate and the hydride donating/accepting carbon (C4) of the nicotinamide group of the coenzyme in MD simulations. (B) RMSD analysis results.

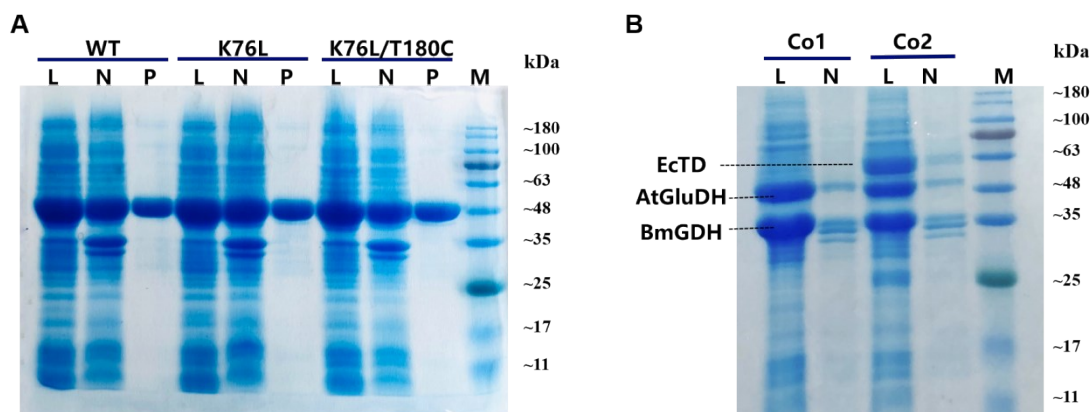

Figure S9. (A) SDS-PAGE of *AtGluDH* and mutants. L: cell free extract, N: precipitation, P: pure protein elution fraction, M: marker. (B) SDS-PAGE of the co-expression systems. Co1: *E.coli* cells co-expressing *AtGluDH* (K76L/T180C) and *BmGDH*, Co2: *E.coli* cells co-expressing *AtGluDH* (K76L/T180C), *BmGDH* and *EcTD*, L: cell free extract, N: precipitation, M: marker. Protein molecular weight: *AtGluDH* (46.7 kDa), *BmGDH* (28.2 kDa), *EcTD* (56.2 kDa).

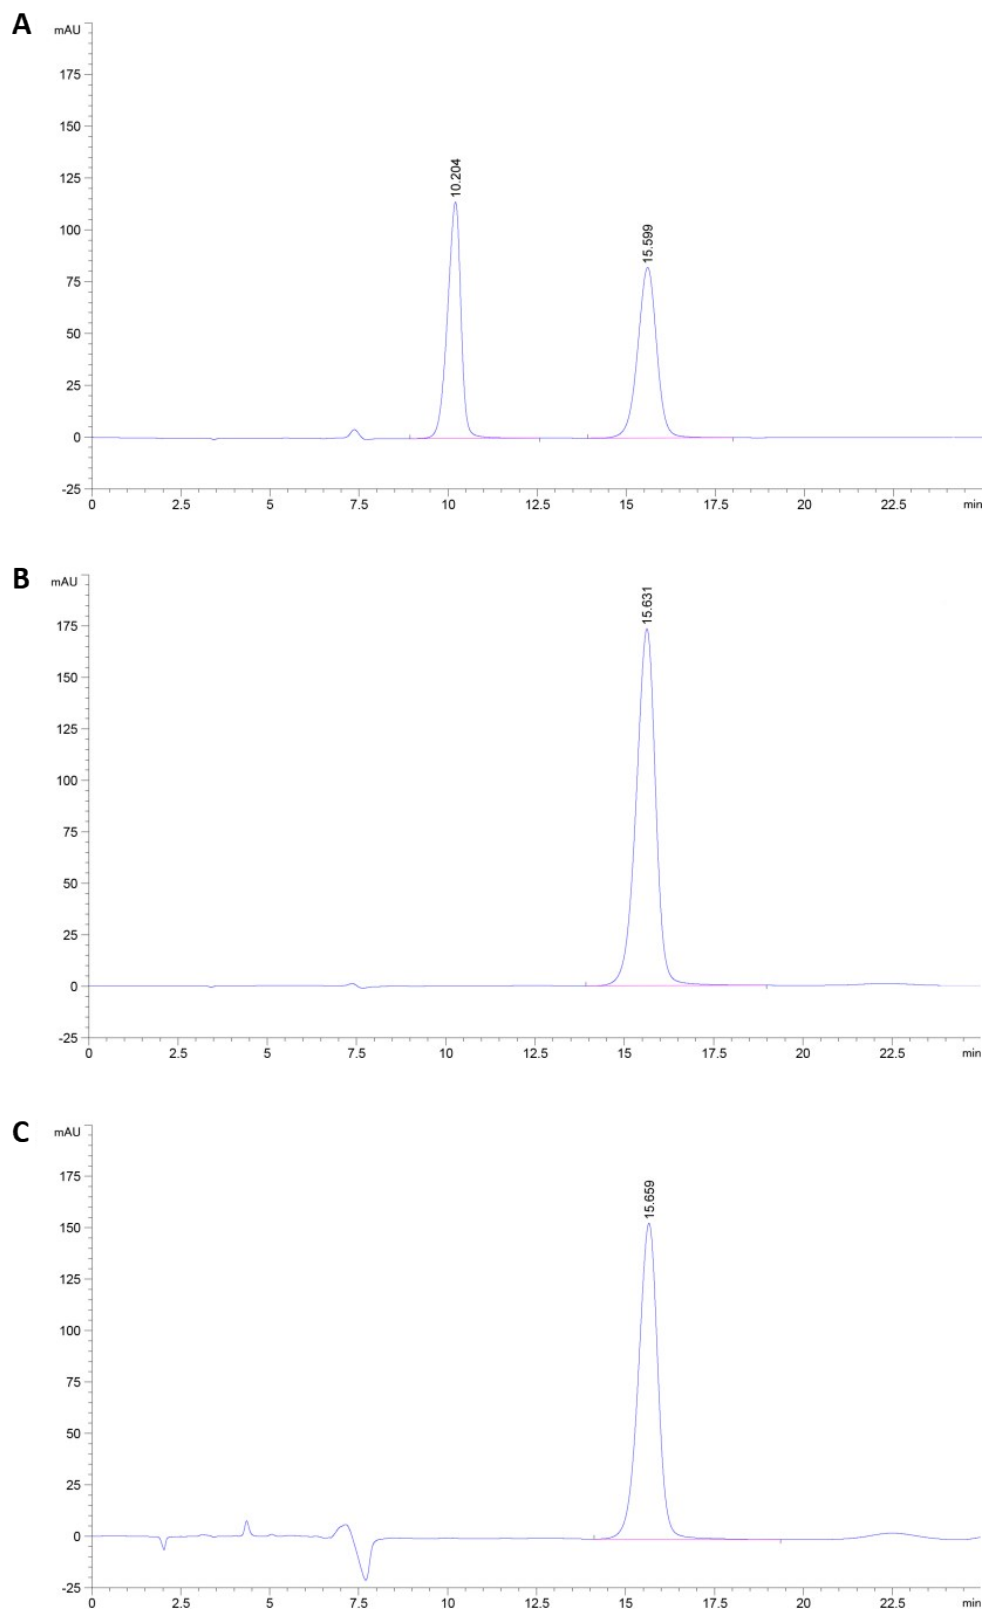

Figure S10. (A) HPLC chromatogram of racemic 2-aminobutyric acid. (B) HPLC chromatogram of L-2-aminobutyric acid. (C) HPLC chromatogram of product L-2-aminobutyric acid yielded by *AtGluDH*.



Figure S11. NMR spectra of the purified L-homoalanine. (A)  $^1\text{H}$  NMR; (B)  $^{13}\text{C}$  NMR.  $^1\text{H}$  NMR (600 MHz,  $\text{D}_2\text{O}$ ):  $\delta = 3.71$  (td,  $J = 5.8, 2.8$  Hz, 1H), 1.89 (m, 2H), 0.97 (td,  $J = 7.6, 1.7$  Hz, 3H);  $^{13}\text{C}$  NMR (150 MHz,  $\text{D}_2\text{O}$ ):  $\delta = 174.9, 55.8, 23.7, 8.5$ .
